1 **Parasitoid wasp venom targets host immune cell production in a *Drosophila*-**  
2 **parasitoid interaction**

3 Authors: Jordann E. Trainor, Pooja KR, Nathan T. Mortimer

4 Affiliation: School of Biological Sciences, Illinois State University, Normal, IL 61790,  
5 USA

6 Corresponding author: Nathan T. Mortimer, School of Biological Sciences, Illinois State  
7 University, Normal, IL 61790, USA. Phone: 1-309-438-8597, email: ntmorti@ilstu.edu

8

## 9 **Abstract**

10           The interactions between *Drosophila melanogaster* and the parasitoid wasps that  
11 infect *Drosophila* species provide an important model for understanding host-parasite  
12 relationships. Following parasitoid infection, *D. melanogaster* larvae mount a response  
13 in which immune cells (hemocytes) form a capsule around the wasp egg, which then  
14 melanizes leading to death of the parasitoid. Previous studies have found that host  
15 hemocyte load, the number of hemocytes available for the encapsulation response, and  
16 the production of lamellocytes, an infection induced hemocyte type, are major  
17 determinants of host resistance. Parasitoids have evolved various virulence  
18 mechanisms to overcome the immune response of the *D. melanogaster* host, including  
19 both active immune suppression by venom proteins and passive immune evasive  
20 mechanisms. We find that a previously undescribed parasitoid species, *Asobara sp.*  
21 *AsDen*, utilizes an active virulence mechanism to infect *D. melanogaster* hosts. *Asobara*  
22 *sp. AsDen* infection inhibits host hemocyte expression of *msn*, a member of the JNK  
23 signaling pathway, which plays a role in lamellocyte production. *Asobara sp. AsDen*  
24 infection restricts the production of lamellocytes as assayed by hemocyte cell  
25 morphology and altered *msn* expression. Our findings suggest that *Asobara sp. AsDen*  
26 venom targets host signaling to suppress immunity.

27 Key words: Parasitoid wasp, virulence strategy, venom, hemocyte, *Drosophila*

28

29 **Declarations**

30 Funding: This work was supported by the National Institute of General Medical Sciences  
31 of the National Institutes of Health under Award Number R35GM133760.

32 Availability of data and material: Sequence data has been deposited in GenBank under  
33 accession # MT498809. Custom BLAST databases are available on request to  
34 corresponding author.

35 Authors' contributions: Conceived of or designed study: J.E.T., N.T.M.; Performed  
36 research: J.E.T., P.K.; Analyzed data: J.E.T., P.K., N.T.M.; Wrote the paper: J.E.T.,  
37 P.K., N.T.M.

38

## 39 1. Introduction

40 Parasitoid wasps that infect *Drosophila* are a valuable model for understanding  
41 parasite behaviour and have provided important ecological and molecular insights into  
42 host-parasite interactions [1–3]. In this system, parasitoids infect larval *Drosophila* and  
43 following infection, *Drosophila* mount a cellular encapsulation response to overcome the  
44 invader [4]. This encapsulation response is highly conserved among arthropods [5–9],  
45 and encapsulation ability is an important determinant of pathogen resistance in insect  
46 vectors of human disease [10–12]. The encapsulation response in *Drosophila*  
47 *melanogaster* is mediated by hemocytes (immune cells), including circulating  
48 macrophage-like cells known as plasmatocytes, and lamellocytes, a highly specialized  
49 infection-induced immune cell subtype [13]. Plasmatocytes are physiologically activated  
50 by parasitoid wasp infection, and following activation they migrate and adhere to the  
51 surface of the parasitoid egg [14, 15]. Immune stimulation also triggers the production of  
52 lamellocytes [16, 17], which adhere to the plasmatocyte cell layer and form a melanized  
53 capsule around the egg, killing the developing parasitoid [15, 18]. There are multiple  
54 routes for lamellocyte production, including the transdifferentiation of plasmatocytes in  
55 circulation or within sessile populations, and differentiation directly from prohemocyte  
56 precursors in the lymph gland, the main hematopoietic organ in *Drosophila* [19–21].

57 It has been proposed that the main determinant of *Drosophila* immune resistance  
58 to parasitoid infection is host hemocyte load [22]. In this context hemocyte load refers  
59 both to the number and activity of hemocytes found in circulation and the potential for  
60 the production of additional hemocytes following infection. Studies have found that an  
61 increased number of hemocytes confers resistance to parasitoid infection in *D.*

62 *melanogaster* and other *Drosophila* species [23–27], and that the production and  
63 function of lamellocytes is critical for a successful encapsulation response [18, 22, 27].

64 *Drosophila* parasitoid wasps have evolved multiple mechanisms that allow them  
65 to evade or overcome the host immune response, the most prevalent of which is the  
66 transfer of venom virulence proteins into the host during infection. Because of the  
67 importance of hemocyte number for resistance, many of these parasitoid virulence  
68 mechanisms target host hemocytes. This includes venom virulence proteins that act on  
69 host hemocytes in a variety of ways including inducing hemocyte lysis [28], promoting  
70 death of hemocyte precursor cells [29, 30], and inhibition of hemocyte function leading  
71 to immunodeficiency [14, 18, 31–34]. Many of these venom proteins specifically target  
72 lamellocytes [17, 18, 28, 34, 35], reinforcing the vital role that this hemocyte subtype  
73 plays in the encapsulation response. The outcome of these venom activities is to  
74 suppress host hemocyte load either by reducing the number or function of these  
75 immune cells.

76 Along with these active immune suppression mechanisms, parasitoids can also  
77 use passive immune evasive mechanisms to escape encapsulation [36, 37]. Proposed  
78 passive mechanisms include the ability of parasitoid eggs to bind to host tissues as a  
79 form of camouflage from the immune response [14, 36, 38], an increase in parasitoid  
80 egg size following infection [39, 40] or superparasitism, where a single host is multiply  
81 infected by conspecific parasitoids, which has been suggested to increase parasitoid  
82 infection success [40–43].

83           The conservation of the encapsulation response in human disease vectors, and  
84 the use of parasitoid wasps as biological control agents makes understanding parasitoid  
85 virulence strategies an important research goal. In the present study, we describe an  
86 uncharacterized parasitoid species of the genus *Asobara* that utilizes a venom mediated  
87 mechanism to suppress *D. melanogaster* lamellocyte development and thereby  
88 overcome host immune defense.

## 89 **2. Results**

### 90 *2.1. AsDen is a strain of an undescribed Asobara species*

91           Female Braconid wasps were caught in Denver, CO, USA and allowed to infect  
92 the *OstΔ<sup>EY02442</sup>* encapsulation deficient *D. melanogaster* strain [18]. These infections  
93 resulted in an all-female parthenogenetic strain which was reared in the lab for several  
94 generations prior to beginning experimentation. We sequenced the COI gene from this  
95 wasp strain and compared the sequence to COI sequences from known Braconid  
96 species. Our sequence analysis suggests that the strain is a previously undescribed  
97 species of the genus *Asobara*. We will refer to this wasp species using the name  
98 *Asobara sp. AsDen* or by the strain name *AsDen* to indicate the genus and location of  
99 collection.

100           Our BLAST analysis of *Asobara sp. AsDen* reveals that the most closely related  
101 species are additional uncharacterized species of *Asobara* identified in recent efforts to  
102 catalog arthropod biodiversity (Table 1) [44–46]. In order to further characterize the  
103 evolutionary relationships between *Asobara sp. AsDen* and these other species, we  
104 performed phylogenetic analysis using COI sequences. We find that *Asobara sp. AsDen*

105 forms a supported clade with the species *Asobara sp. ABZ3773* and *Asobara sp.*  
106 *ABX5347* [46] (Figure 1A). Interestingly these species are also found in North America  
107 (Table S1), further suggesting a recent evolutionary relationship. Additional  
108 phylogenetic analysis with previously studied species of *Asobara* suggests that the  
109 species group including *Asobara sp. AsDen*, *Asobara sp. ABZ3773* and *Asobara sp.*  
110 *ABX5347* is most closely related to *Asobara triangulata*, a species known from a single  
111 sample collected in Yunnan, China [47], *Asobara mesocauda*, a species collected in  
112 South Korea and China [47], and the well-studied species *Asobara rufescens* and  
113 *Asobara tabida* which have both been found in Asia, Europe and North America [46–48]  
114 (Figure 1B and Table S2).

## 115 2.2. *Asobara sp. AsDen* avoids encapsulation by *D. melanogaster* hosts

116 *AsDen* wasps readily infect *D. melanogaster* larvae, with 98.8% of hosts infected  
117 after a 72-hour exposure period (n = 90 larvae). We find that the *D. melanogaster*  
118 immune response successfully encapsulated only 36.6% of *AsDen* eggs (n = 372 eggs),  
119 and that 34.8% of infected *D. melanogaster* larvae were able to encapsulate all of the  
120 infecting *AsDen* eggs (n = 89 infected larvae). To survive infection, a host must  
121 encapsulate every infecting parasitoid egg, so these data suggest a high rate of  
122 successful parasitization of *D. melanogaster* hosts by *AsDen*. Interestingly, 77.5% of  
123 infected *D. melanogaster* larvae were infected more than once during the exposure  
124 period, for an average of 4.2 eggs/infected host larva (n = 89 infected larvae). We find a  
125 significant negative correlation between the number of eggs laid per larva and the  
126 proportion of eggs that are encapsulated (Figure 2A; Pearson's  $r = -0.576$ ,  $p < 0.001$ ).  
127 Taken together, these data suggest that *AsDen* can successfully parasitize *D.*

128 *melanogaster* hosts and that multiply infected host larvae are less likely to survive  
129 infection.

130         Similar to other *Asobara* species [39, 40], we find that *AsDen* eggs continue to  
131 grow in size as they develop in *D. melanogaster* hosts. Eggs were dissected from  
132 infected *D. melanogaster* larvae at 48hpi and 72hpi and the length and width of each  
133 individual egg was determined. Unencapsulated eggs continue to increase in length  
134 (Figure 2B;  $t = 4.309$ ,  $p < 0.001$ ) and width (Figure 2C;  $t = 7.678$ ,  $p < 0.001$ ) between  
135 48hpi and 72hpi. To verify that encapsulation was arresting parasitoid development, the  
136 length and width of individual encapsulated and melanized eggs were determined at  
137 48hpi and 72hpi to compare with unencapsulated eggs. We find that the melanized  
138 eggs are significantly shorter (Figure 2B;  $t = -8.285$ ,  $p < 0.001$ ), and narrower (Figure  
139 2C;  $t = -8.382$ ,  $p < 0.001$ ) than unencapsulated eggs at 72hpi. Additionally, the increase  
140 in size that is seen in unencapsulated eggs is arrested in encapsulated eggs, with no  
141 significant size differences observed in encapsulated eggs dissected at 48hpi and 72hpi  
142 (Figure 2B-C; length:  $t = 1.237$ ,  $p = 0.602$ ; width:  $t = -0.624$ ,  $p = 0.9221$ ).

### 143 2.3. Host lamellocyte production is impaired in *Asobara* sp. *AsDen* infected larvae

144         Many parasitoid species transfer venom virulence proteins to their host during  
145 infection to suppress hemocyte number or activity. Often these virulence proteins target  
146 lamellocytes, a parasitoid-infection induced hemocyte subtype that is required for a  
147 successful encapsulation response [27–30]. Lamellocytes are larger and less circular  
148 than other hemocytes, and can be distinguished from other hemocyte subtypes both by  
149 their unique morphology and by the specific expression of *misshapen* (*msn*) [49, 50].



150 Lamellocytes are produced both by the direct differentiation of prohemocytes in the  
151 hematopoietic lymph gland and by the transdifferentiation of circulating or sessile  
152 plasmatocytes [16, 19–21], and both routes result in *msn* expression [49].

153 To assay the production of lamellocytes in *AsDen* infected larvae, we used a  
154 fluorescent cytometer to take high throughput measurements of cell size, cell perimeter,  
155 cell circularity, and *mCherry* fluorescence intensity from hemocytes isolated from  
156 infected larvae of the *msn-mCherry* strain. This strain expresses *mCherry* as a  
157 fluorescent reporter of *msn* expression [51]. Because lamellocyte production is induced  
158 by parasitoid infection, *msn* is not expressed in the hemocytes of naïve larvae, and so  
159 we used infection with the parasitoid *Leptopilina boulardi* as a comparison for *AsDen*  
160 venom activity. *L. boulardi* infection does not inhibit expression of *msn* or lamellocyte  
161 development and so provides a reliable control [17, 52, 53]. We find that following *L.*  
162 *boulardi* infection,  $45.1 \pm 4.2\%$  of circulating hemocytes express the *msn-mCherry*  
163 reporter ( $n = 32,176$  hemocytes). In these *L. boulardi* infected larvae, the *msn-mCherry*  
164 positive cells are larger (cell size:  $t = 29.265$ ,  $p < 0.001$ ; cell perimeter:  $t = 29.442$ ,  $p <$   
165  $0.001$ ) and less circular ( $t = 21.796$ ,  $p < 0.001$ ) than cells not expressing *msn-mCherry*,  
166 consistent with the described properties of lamellocytes [50].

167 We find that  $21.4 \pm 1.8\%$  of hemocytes in *AsDen* infected *msn-mCherry* larvae  
168 were *msn* positive ( $n = 53,908$  hemocytes), a significantly lower proportion than  
169 observed in stage matched *L. boulardi* infected *msn-mCherry* larvae (Figure 3A;  $z =$   
170  $7.328$ ,  $p < 0.001$ ). We further find that among the *mCherry* positive hemocytes, cells  
171 from *AsDen* infected larvae had significantly lower fluorescence intensity compared to  
172 cells from *L. boulardi* infected larvae (Figure 3B;  $z = 4.838$ ,  $p < 0.001$ ). These

173 differences in *msn* expression may be predicted to result in differences in hemocyte  
174 morphology from *L. boulardi* and *AsDen* infected larvae. To better compare cell  
175 morphology between infections, we used principal components analysis (PCA) to  
176 reduce the cell size, cell perimeter and cell circularity measures from the cytometer data  
177 to a single dimension. The first principal component of this cell morphology PCA (PCM)  
178 has an eigenvalue of 2.35 and explains 78.4% of the variance among these data,  
179 suggesting that it accurately captures the data describing hemocyte morphology. We  
180 find that PCM values differ significantly between hemocytes from *AsDen* and *L. boulardi*  
181 infected larvae (Figure 3C;  $t = 17.03$ ,  $p < 0.001$ ), implying that hemocyte morphology  
182 does vary by infection condition.

183         To further characterize the hemocyte populations in *AsDen* and *L. boulardi*  
184 infected larvae, we performed a second PCA using the previously listed cell morphology  
185 features and *mCherry* fluorescence intensity data. We plotted the first two dimensions of  
186 this PCA (PC1 and PC2; Table 2), and we find that hemocytes from *L. boulardi* infected  
187 larvae (red triangles in Figure 4A-B) largely cluster into two groups, distinguished by  
188 morphology and fluorescence intensity. Although hemocytes from *AsDen* infected  
189 larvae fall into a similar pattern (black circles in Figure 4A-B), one of these groups is  
190 greatly reduced. The same pattern is replicated when only data from *mCherry* positive  
191 cells are used for the PCA (Figure 4C-D). However, the PCA plots derived from  
192 *mCherry* negative hemocyte properties are indistinguishable between *AsDen* and *L.*  
193 *boulardi* infected larvae (Figure 4E-F). These data support the hypothesis that *msn*  
194 expressing hemocytes are differentially affected by the parasitoid infections. Based on

195 the role of *msn* in lamellocyte production and the observed morphology differences,  
196 these data suggest that lamellocyte production is impaired following *AsDen* infection.

### 197 **3. Discussion**

198 Our findings suggest that a previously uncharacterized parasitoid species from  
199 the genus *Asobara*, represented here by the *AsDen* strain, can successfully parasitize  
200 *D. melanogaster*. *Asobara* sp. *AsDen* is evolutionarily related to other *Drosophila*  
201 infecting parasitoids including *A. tabida*, although the host ranges of the more closely  
202 related, uncharacterized species found in North America are unknown. To characterize  
203 the effects of *AsDen* infection on host hemocyte load, and specifically hemocyte  
204 morphology and *msn* expression, we compared the properties of hemocytes from  
205 *AsDen* infected hosts to hemocytes from *L. boulardi* infected hosts. *L. boulardi* infection  
206 triggers *msn* expression and lamellocyte production, and *L. boulardi* venom has no  
207 known impact on these processes [17, 38, 52, 53], suggesting that this infection can  
208 serve as a useful control for our analyses.

209 We find that *AsDen* infection has a distinct effect on both hemocyte morphology  
210 and *msn* expression in host hemocytes when compared with *L. boulardi* infection. In the  
211 encapsulation response, *msn* is expressed in lamellocytes following infection and *msn*  
212 signaling activity is required for lamellocyte production [51, 54]. The proportion of *msn*-  
213 positive immune cells is lowered following *AsDen* infection, and *msn* expression levels  
214 are decreased in immune cells isolated from *AsDen* infected larvae in comparison with  
215 *L. boulardi* infected larvae (Figure 3). These findings suggest that *AsDen* infection  
216 inhibits host immune signaling leading to the failure to properly promote lamellocyte

217 specification or development. In agreement with this hypothesis, we find that while  
218 hemocytes from *L. boulardi* infected hosts cluster into two populations based on their  
219 morphology and *msn* expression levels, one of these populations is greatly reduced in  
220 *AsDen* infected hosts (Figure 4A-B). Lamellocytes tend to be larger and more irregularly  
221 shaped than plasmatocytes [50]. An examination of the factor loading from our cell  
222 morphology and fluorescence intensity PCA results (Table 2), suggests that the reduced  
223 cell population in *AsDen* infected larvae tends to be larger, less circular and *msn*  
224 positive (Figure 4), all of which are consistent with a specific deficit in lamellocyte  
225 production. The finding that this alteration in hemocyte characteristics is observed in  
226 *msn* positive cells (Figure 4C-D) but not *msn* negative cells (Figure 4E-F) further  
227 suggests that the activity of *AsDen* venom is specifically targeting *msn* and/or  
228 lamellocyte production.

229 *msn* is a member of the JNK signal transduction pathway [55] and *msn-mCherry*  
230 provides a readout of JNK pathway activity [51]. This suggests that the JNK signaling  
231 pathway may be inhibited in *AsDen* infected larvae. We have yet to determine the  
232 molecular mechanism underlying JNK inhibition in *AsDen* infected larvae, but we  
233 propose it could act either directly through inhibiting one or more components of the  
234 JNK pathway or indirectly by blocking upstream pathway activation to inhibit lamellocyte  
235 production. The JNK pathway plays a conserved role in immunity in *Drosophila* and a  
236 wide range of species [9, 56, 57]. In *D. melanogaster*, genes in the JNK pathway are  
237 associated with resistance to parasitoids [58, 59], and are required for lamellocyte  
238 production in response to infection [51]. To our knowledge, *AsDen* is the first *Drosophila*

239 parasitoid suggested to inhibit JNK signaling, however the JNK pathway is targeted by a  
240 wide range of other pathogens in variety of hosts [60–62].

241 It is notable that *AsDen* infected larvae do still produce *msn* positive hemocytes,  
242 suggesting that lamellocyte differentiation and JNK signaling are not completely  
243 abolished. Additionally, even though the morphological changes leading to lamellocyte  
244 production are impaired in *AsDen* infected larvae, the cell morphology of *msn*  
245 expressing hemocytes is different from non-*msn* expressing hemocytes. These data  
246 suggest that *AsDen* venom may be inhibiting a specific aspect of lamellocyte  
247 transdifferentiation or maturation, consistent with the finding that *msn* expression  
248 coincides with early morphological changes in transdifferentiating hemocytes [49].  
249 Recent studies have uncovered a broader range of *Drosophila* hemocyte subtypes than  
250 previously appreciated [63–66], and future investigation into this complexity may help to  
251 unravel the specific effects of *AsDen* venom on host hemocytes and lamellocyte  
252 production.

253 Along with restricted lamellocyte production, *AsDen* infected hosts have a limited  
254 encapsulation response. Interestingly, we find a negative correlation between the  
255 number of times a host larva has been infected and its encapsulation ability (Figure 2A).  
256 Multiple infections of a single host by conspecific parasitoids is known as  
257 superparasitism [67], and is commonly observed across many parasitoid species both in  
258 laboratory conditions and in nature. The negative effect of superparasitism on host  
259 resistance observed in our study may be due the additive effects of multiple  
260 envenomations on host lamellocyte production; perhaps additional “doses” of venom  
261 are able to more completely suppress lamellocyte production. However, we cannot rule

262 out the possibility that superparasitism is acting through an alternative mechanism such  
263 as passive immune evasion [36, 37]. Supernumerary infections by the parasitoids  
264 *Pseudapanteles dignus* and *A. tabida* have been shown to increase the likelihood of  
265 successful parasitization [40, 42], suggesting that superparasitism itself may contribute  
266 to the ability of the parasitoid egg to escape from encapsulation. Parasitoids generally  
267 avoid superparasitism; most parasitoid species are able to perceive the presence of  
268 eggs from a conspecific female [39, 41, 68], and in previous work, we found that using  
269 the identical experimental set up with other parasitoid species consistently yields  
270 average infection rates of 1-1.2 eggs per infected larva [14, 38], in contrast to the 4.2  
271 eggs per infected larva observed for *AsDen*. Many known instances of superparasitism  
272 are driven by external factors such viral infections [69–71], but this has not yet been  
273 determined in this case.

274 In *Asobara sp. AsDen* and many other parasitoid species, virulence appears to  
275 be largely driven by a single strategy, for example the passive immune avoidance of *A.*  
276 *tabida* or the immune suppressive venoms of *AsDen*, *Asobara citri*, *Asobara japonica* or  
277 various species of Figitid parasitoid wasps [30, 32, 36, 72–74]. However, both *L.*  
278 *boulardi* and *Ganaspis hookeri* appear to use a combined strategy of venom-mediated  
279 immune suppression and passive avoidance [14, 37, 38], suggesting that further study  
280 may uncover more complex virulence strategies across a range of parasitoids than  
281 previously appreciated. Further, while *A. tabida* is the most closely related of the well-  
282 studied parasitoid species to *Asobara sp. AsDen*, its venom has been shown to cause  
283 paralysis and inhibit host development with only limited immune-suppressive effects [36,  
284 75–79]. This is not entirely unexpected, as other closely related parasitoid species have

285 distinct virulence strategies and venom composition [37, 38, 80]. It has also been  
286 demonstrated that different strains of a single parasitoid species can possess different  
287 virulence activities [81–83]. As *AsDen* is the only known strain of its species, we aren't  
288 able to determine how conserved this activity may be with other strains, although this  
289 will hopefully be investigated as more strains of this species are identified.

290 Our findings support the idea that overcoming host hemocyte load is a critical  
291 determinant of parasitization success for parasitoid wasps of *Drosophila*. Since  
292 *Drosophila* are a valuable model for understanding the immune defenses of insect  
293 vectors of human disease and agricultural pests, these findings may provide insight into  
294 the interactions between insect vectors and invading pathogens and may have  
295 implications for the selection and use of parasitoid wasps in biological control  
296 applications.

## 297 **4. Materials and Methods**

### 298 *4.1. Insect Strains*

299 Two females from an unknown Braconid parasitoid wasp species were collected  
300 from a fruit trap in Denver, Colorado, USA and were maintained on the encapsulation  
301 deficient *D. melanogaster* mutant strain *Ost* $\Delta^{EY02442}$  (BDSC: 15565) [18] from the  
302 Bloomington Drosophila Stock Center. A sub-strain was established from a single  
303 parthenogenetic foundress and will be referred to as *AsDen*. The study also uses the  
304 parasitoid wasp *Leptopilina boulardi* (strain Lb17) [38] which is maintained in the  
305 laboratory on the *Canton S D. melanogaster* strain. The following additional *D.*

306 *melanogaster* strains were used in this study: *w*<sup>1118</sup> (BDSC: 5905) from the Bloomington  
307 *Drosophila* Stock Center; and *msn-mCherry* [51], provided by Dr. Robert Schulz.

#### 308 4.2. Parasitoid species determination

309 Genomic DNA was extracted from *AsDen* using standard methods. The COI  
310 gene was amplified using the “Folmer” primers [84] LCO1490 (primer sequence:  
311 GGTCACAAATCATAAAGATATTGG) and HCO2198 (primer sequence:  
312 TAACTTCAGGGTGACCAAAAATCA), and sequenced at the UIUC Core  
313 Sequencing Facility (Urbana, IL). The resulting Sanger sequencing reads were aligned  
314 using 4Peaks software (A. Griekspoor and Tom Groothuis, nucleobytes.com). The  
315 *Asobara* sp. *AsDen* COI DNA sequence was submitted to GenBank (accession #  
316 MT498809) The resulting DNA sequence was compared against all Hymenopteran  
317 sequences using the Basic Local Alignment Search Tool (BLAST) available through the  
318 National Center for Biotechnology Information (NCBI) [85]. For further sequence  
319 analysis, we constructed a custom BLAST database of all 353 *Asobara* COI sequences  
320 available from NCBI (accessed April 11, 2020) using BLAST+ (version 2.5.0) [86]. This  
321 custom BLAST database is available upon request.

#### 322 4.3. Phylogenetics

323 Phylogenetic analyses were conducted in MEGA X [87, 88] using COI DNA  
324 sequences. For the first analysis, *AsDen* was compared to the 25 most highly  
325 homologous *Asobara* sequences as determined by BLAST+ (Supplemental Table 1)  
326 [44–46]. For the second analysis, the species group including *AsDen* found in the first  
327 analysis was compared against 13 well-studied species of *Asobara* (Supplemental



328 Table 2) [26, 47, 89, 90]. For both analyses, the evolutionary history was inferred by  
329 using the Maximum Likelihood method and Kimura 2-parameter model with 1000  
330 bootstrap replicates [91]. The initial tree for the heuristic search was obtained  
331 automatically by applying Neighbor-Join and BioNJ algorithms to a matrix of pairwise  
332 distances estimated using the Maximum Composite Likelihood (MCL) approach in  
333 MEGA X, and then selecting the topology with superior log likelihood value. Branches  
334 corresponding to partitions reproduced in less than 50% of the bootstrap replicates were  
335 collapsed. All positions containing gaps and missing data were eliminated. The resulting  
336 phylogenetic trees were visualized using FigTree (version 1.4.3,  
337 <http://tree.bio.ed.ac.uk/>).

#### 338 *4.4. Parasitoid infection*

339 For infection with parasitoid wasps, 30 late second instar larvae from the  $w^{1118}$   
340 strain were placed on 35mm Petri dishes filled with Drosophila medium together with 3  
341 *AsDen* wasps at 25°C. Larvae were dissected at 48- or 72-hours post infection (hpi) as  
342 noted. The infected larvae were then scored for the total number of parasitoid eggs and  
343 the numbers of encapsulated and non-encapsulated eggs. For size experiments, the  
344 length and width of each egg was determined using an E-series Reticle (Leica  
345 Microsystems). Egg length was measured from pole to pole and egg width was  
346 measured across the widest region perpendicular to the length axis. All experiments  
347 were performed in triplicate.

#### 348 *4.5. msn expression and cell morphology analyses*

349           The *msn-mCherry D. melanogaster* strain was used to assay expression of *msn*.  
350 This strain carries a transgenic construct containing the *msn-F9* enhancer upstream of  
351 the *mCherry* red fluorescent protein [51]. Second instar *msn-mCherry* larvae were  
352 infected by either *AsDen* or *L. boulardi* as described above, with three biological  
353 replicates for each infection condition. Host hemocytes were isolated 72hpi and added  
354 to a Tali Cellular Analysis Slide (Invitrogen). Hemocytes were allowed to adhere for 30  
355 minutes and then cell number, size, perimeter, circularity and red fluorescence intensity  
356 were measured using a Tali Image-Based Cytometer (Invitrogen). For each replicate,  
357 we imaged 20 fields of cells, with an average of 717.4 cells per field, and a range of 194  
358 to 1455 cells for a total of 32,176 hemocytes from *L. boulardi* infected larvae and 53,908  
359 hemocytes from *AsDen* infected larvae. Cytometer data were filtered to only include  
360 single cells using the Tali software count function and size-gating, prior to further  
361 analysis.

#### 362 4.6. Data analysis

363           All statistical analyses were done in the R statistical computing environment [92]  
364 using the multcomp [93], lme4 [94], lmerTest [95], plyr [96], FactoMineR [97], factoextra  
365 [98] and ggplot2 [99] packages. Analysis of Variance (ANOVA) was used to test the  
366 relationship between egg size and time or encapsulation status. Tukey's Honest  
367 significant difference (HSD) test was used for multiple comparisons of egg size.  
368 Pearson's product-moment correlation was used to test for correlations between egg  
369 number and encapsulation status. Mixed linear models, with replicate as a random  
370 effect, were used to test for differences in *msn-mCherry* fluorescence intensity and  
371 proportion of *mCherry* positive cells between *AsDen* and *L. boulardi* infections. Welch

372 Two Sample t-tests were used to compare immune cell morphology data between  
373 *AsDen* and *L. bouleari* infections.

374 To characterize hemocyte populations, we used PCA on the red fluorescence  
375 intensity, cell size, cell perimeter and cell circularity measures from the cytometer data.  
376 A circularity value of 1.0 is considered perfectly circular, and values either greater or  
377 less than 1.0 are increasingly less circular. To account for this, circularity values were  
378  $\log_2$  transformed and the absolute value of these transformed values were used for  
379 PCA. Other measures were used for PCA without transformation. This analysis was  
380 repeated separately on gated fluorescence data, generating distinct PCA scores for  
381 *mCherry* positive hemocytes and *mCherry* negative hemocytes.

## 382 **Acknowledgements**

383 The authors would like to thank Dr. Robert Schulz for providing the *msn-mCherry* line.  
384 We would also like to thank members of the Mortimer Cellular Immunology lab for their  
385 input throughout the project. Stocks obtained from the Bloomington Drosophila Stock  
386 Center (NIH P40OD018537) were used in this study.

387

## 388 References

- 389 1. Fleury F, Gibert P, Ris N, Allemand R (2009) Ecology and life history evolution of  
390 frugivorous *Drosophila* parasitoids. *Adv Parasitol* 70:3–44. [https://doi.org/10.1016/S0065-](https://doi.org/10.1016/S0065-308X(09)70001-6)  
391 [308X\(09\)70001-6](https://doi.org/10.1016/S0065-308X(09)70001-6)
- 392 2. Kraaijeveld AR, Godfray HCJ (2009) Evolution of host resistance and parasitoid counter-  
393 resistance. In: *Parasitology B-A* in (ed). Academic Press, pp 257–280
- 394 3. Mortimer NT (2013) Parasitoid wasp virulence: A window into fly immunity. *Fly (Austin)*  
395 7:242–248. <https://doi.org/10.4161/fly.26484>
- 396 4. Kim-Jo C, Gatti J-L, Poirié M (2019) *Drosophila* cellular immunity against parasitoid wasps:  
397 A complex and time-dependent process. *Front Physiol* 10:603.  
398 <https://doi.org/10.3389/fphys.2019.00603>
- 399 5. Salt G (1963) The defence reactions of insects to metazoan parasites. *Parasitology*  
400 53:527–642. <https://doi.org/10.1017/S0031182000073960>
- 401 6. Ratner S, Vinson SB (1983) Phagocytosis and encapsulation: Cellular immune responses  
402 in arthropoda. *Integr Comp Biol* 23:185–194. <https://doi.org/10.1093/icb/23.1.185>
- 403 7. Strand MR, Pech LL (1995) Immunological basis for compatibility in parasitoid-host  
404 relationships. *Annu Rev Entomol* 40:31–56.  
405 <https://doi.org/10.1146/annurev.en.40.010195.000335>
- 406 8. Vazquez L, Alpuche J, Maldonado G, et al (2009) Review: Immunity mechanisms in  
407 crustaceans. *Innate Immun* 15:179–188. <https://doi.org/10.1177/1753425909102876>
- 408 9. Hillyer JF (2016) Insect immunology and hematopoiesis. *Dev Comp Immunol* 58:102–118.  
409 <https://doi.org/10.1016/j.dci.2015.12.006>
- 410 10. Gorman MJ, Severson DW, Cornel AJ, et al (1997) Mapping a quantitative trait locus  
411 involved in melanotic encapsulation of foreign bodies in the malaria vector, *Anopheles*  
412 *gambiae*. *Genetics* 146:965–971
- 413 11. Zheng L (1999) Genetic basis of encapsulation response in *Anopheles gambiae*.  
414 *Parassitologia* 41:181–184
- 415 12. Molina-Cruz A, DeJong RJ, Ortega C, et al (2012) Some strains of *Plasmodium falciparum*,  
416 a human malaria parasite, evade the complement-like system of *Anopheles gambiae*  
417 mosquitoes. *Proc Natl Acad Sci U S A* 109:E1957-1962.  
418 <https://doi.org/10.1073/pnas.1121183109>
- 419 13. Honti V, Csordás G, Kurucz É, et al (2014) The cell-mediated immunity of *Drosophila*  
420 *melanogaster*. Hemocyte lineages, immune compartments, microanatomy and regulation.  
421 *Dev Comp Immunol* 42:47–56. <https://doi.org/10.1016/j.dci.2013.06.005>

- 422 14. Mortimer NT, Goecks J, Kacsoh BZ, et al (2013) Parasitoid wasp venom SERCA regulates  
423 *Drosophila* calcium levels and inhibits cellular immunity. Proc Natl Acad Sci 110:9427–  
424 9432. <https://doi.org/10.1073/pnas.1222351110>
- 425 15. Russo J, Dupas S, Frey F, et al (1996) Insect immunity: early events in the encapsulation  
426 process of parasitoid (*Leptopilina bouleardi*) eggs in resistant and susceptible strains of  
427 *Drosophila*. Parasitology 112 (Pt 1):135–142. <https://doi.org/10.1017/s0031182000065173>
- 428 16. Lanot R, Zachary D, Holder F, Meister M (2001) Postembryonic hematopoiesis in  
429 *Drosophila*. Dev Biol 230:243–257. <https://doi.org/10.1006/dbio.2000.0123>
- 430 17. Rizki TM, Rizki RM (1992) Lamellocyte differentiation in *Drosophila* larvae parasitized by  
431 *Leptopilina*. Dev Comp Immunol 16:103–110. [https://doi.org/10.1016/0145-305x\(92\)90011-](https://doi.org/10.1016/0145-305x(92)90011-)  
432 z
- 433 18. Mortimer NT, Kacsoh BZ, Keebaugh ES, Schlenke TA (2012) Mgat1-dependent N-  
434 glycosylation of membrane components primes *Drosophila melanogaster* blood cells for  
435 the cellular encapsulation response. PLoS Pathog 8:e1002819.  
436 <https://doi.org/10.1371/journal.ppat.1002819>
- 437 19. Krzemien J, Oyallon J, Crozatier M, Vincent A (2010) Hematopoietic progenitors and  
438 hemocyte lineages in the *Drosophila* lymph gland. Dev Biol 346:310–319.  
439 <https://doi.org/10.1016/j.ydbio.2010.08.003>
- 440 20. Honti V, Csordás G, Márkus R, et al (2010) Cell lineage tracing reveals the plasticity of the  
441 hemocyte lineages and of the hematopoietic compartments in *Drosophila melanogaster*.  
442 Mol Immunol 47:1997–2004. <https://doi.org/10.1016/j.molimm.2010.04.017>
- 443 21. Márkus R, Laurinyecz B, Kurucz E, et al (2009) Sessile hemocytes as a hematopoietic  
444 compartment in *Drosophila melanogaster*. Proc Natl Acad Sci U S A 106:4805–4809.  
445 <https://doi.org/10.1073/pnas.0801766106>
- 446 22. Gerritsma S, Haan A de, Zande L van de, Wertheim B (2013) Natural variation in  
447 differentiated hemocytes is related to parasitoid resistance in *Drosophila melanogaster*. J  
448 Insect Physiol 59:148–158. <https://doi.org/10.1016/j.jinsphys.2012.09.017>
- 449 23. Eslin P, Prévost G (1996) Variation in *Drosophila* concentration of haemocytes associated  
450 with different ability to encapsulate *Asobara tabida* larval parasitoid. J Insect Physiol  
451 42:549–555. [https://doi.org/10.1016/0022-1910\(95\)00134-4](https://doi.org/10.1016/0022-1910(95)00134-4)
- 452 24. Prévost G, Eslin P (1998) Hemocyte load and immune resistance to *Asobara tabida* are  
453 correlated in species of the *Drosophila melanogaster* subgroup. J Insect Physiol 44:807–  
454 816. [https://doi.org/10.1016/s0022-1910\(98\)00013-4](https://doi.org/10.1016/s0022-1910(98)00013-4)
- 455 25. Kraaijeveld AR, Limentani EC, Godfray HC (2001) Basis of the trade-off between  
456 parasitoid resistance and larval competitive ability in *Drosophila melanogaster*. Proc Biol  
457 Sci 268:259–261. <https://doi.org/10.1098/rspb.2000.1354>
- 458 26. Kacsoh BZ, Schlenke TA (2012) High hemocyte load is associated with increased  
459 resistance against parasitoids in *Drosophila suzukii*, a relative of *D. melanogaster*. PloS  
460 One 7:e34721. <https://doi.org/10.1371/journal.pone.0034721>

- 461 27. Sorrentino RP, Melk JP, Govind S (2004) Genetic analysis of contributions of Dorsal group  
462 and JAK-Stat92E pathway genes to larval hemocyte concentration and the egg  
463 encapsulation response in *Drosophila*. *Genetics* 166:1343–1356.  
464 <https://doi.org/10.1534/genetics.166.3.1343>
- 465 28. Rizki RM, Rizki TM (1990) Parasitoid virus-like particles destroy *Drosophila* cellular  
466 immunity. *Proc Natl Acad Sci U S A* 87:8388–8392.  
467 <https://doi.org/10.1073/pnas.87.21.8388>
- 468 29. Chiu H, Govind S (2002) Natural infection of *D. melanogaster* by virulent parasitic wasps  
469 induces apoptotic depletion of hematopoietic precursors. *Cell Death Differ* 9:1379–1381.  
470 <https://doi.org/10.1038/sj.cdd.4401134>
- 471 30. Moreau SJM, Eslin P, Giordanengo P, Doury G (2003) Comparative study of the strategies  
472 evolved by two parasitoids of the genus *Asobara* to avoid the immune response of the  
473 host, *Drosophila melanogaster*. *Dev Comp Immunol* 27:273–282.  
474 [https://doi.org/10.1016/s0145-305x\(02\)00101-5](https://doi.org/10.1016/s0145-305x(02)00101-5)
- 475 31. Labrosse C, Eslin P, Doury G, et al (2005) Haemocyte changes in *D. melanogaster* in  
476 response to long gland components of the parasitoid wasp *Leptopilina boulardi*: a Rho-  
477 GAP protein as an important factor. *J Insect Physiol* 51:161–170.  
478 <https://doi.org/10.1016/j.jinsphys.2004.10.004>
- 479 32. Furihata SX, Matsumoto H, Kimura MT, Hayakawa Y (2013) Venom components of  
480 *Asobara japonica* impair cellular immune responses of host *Drosophila melanogaster*. *Arch*  
481 *Insect Biochem Physiol* 83:86–100. <https://doi.org/10.1002/arch.21093>
- 482 33. Colinet D, Dubuffet A, Cazes D, et al (2009) A serpin from the parasitoid wasp *Leptopilina*  
483 *boulardi* targets the *Drosophila* phenoloxidase cascade. *Dev Comp Immunol* 33:681–689.  
484 <https://doi.org/10.1016/j.dci.2008.11.013>
- 485 34. Colinet D, Schmitz A, Depoix D, et al (2007) Convergent use of RhoGAP toxins by  
486 eukaryotic parasites and bacterial pathogens. *PLOS Pathog* 3:e203.  
487 <https://doi.org/10.1371/journal.ppat.0030203>
- 488 35. Rizki RM, Rizki TM (1991) Effects of lamelloylysin from a parasitoid wasp on *Drosophila*  
489 blood cells *in vitro*. *J Exp Zool* 257:236–244. <https://doi.org/10.1002/jez.1402570214>
- 490 36. Eslin P, Prévost G (2000) Racing against host's immunity defenses: a likely strategy for  
491 passive evasion of encapsulation in *Asobara tabida* parasitoids. *J Insect Physiol* 46:1161–  
492 1167. [https://doi.org/10.1016/S0022-1910\(99\)00227-9](https://doi.org/10.1016/S0022-1910(99)00227-9)
- 493 37. Rizki TM, Rizki RM, Carton Y (1990) *Leptopilina heterotoma* and *L. boulardi*: strategies to  
494 avoid cellular defense responses of *Drosophila melanogaster*. *Exp Parasitol* 70:466–475.  
495 [https://doi.org/10.1016/0014-4894\(90\)90131-u](https://doi.org/10.1016/0014-4894(90)90131-u)
- 496 38. Schlenke TA, Morales J, Govind S, Clark AG (2007) Contrasting infection strategies in  
497 generalist and specialist wasp parasitoids of *Drosophila melanogaster*. *PLOS Pathog*  
498 3:e158. <https://doi.org/10.1371/journal.ppat.0030158>



- 499 39. van Alphen JJM, Nell HW (1982) Superparasitism and host discrimination by *Asobara*  
500 *tabida* Nees (Braconidae: Alysiniinae); a larval parasitoid of *Drosophilidae*. *Neth J Zool Neth.*  
501 <https://doi.org/10.1163/002829682X00157>
- 502 40. Mollema C (1988) Genetical aspects of resistance in a host-parasitoid interaction.  
503 University of Leiden
- 504 41. Salt G (1934) Experimental studies in insect parasitism. II.—Superparasitism. *Proc R Soc*  
505 *Lond Ser B Contain Pap Biol Character* 114:455–476.  
506 <https://doi.org/10.1098/rspb.1934.0019>
- 507 42. Luna MG, Desneux N, Schneider MI (2016) Encapsulation and self-superparasitism of  
508 *Pseudapanteles dignus* (Muesebeck) (Hymenoptera: Braconidae), a parasitoid of *Tuta*  
509 *absoluta* (Meyrick) (Lepidoptera: Gelechiidae). *PloS One* 11:e0163196.  
510 <https://doi.org/10.1371/journal.pone.0163196>
- 511 43. van Alphen JJ, Visser ME (1990) Superparasitism as an adaptive strategy for insect  
512 parasitoids. *Annu Rev Entomol* 35:59–79.  
513 <https://doi.org/10.1146/annurev.en.35.010190.000423>
- 514 44. Ashfaq M, Sabir JSM, El-Ansary HO, et al (2018) Insect diversity in the Saharo-Arabian  
515 region: Revealing a little-studied fauna by DNA barcoding. *PLoS ONE* 13:.  
516 <https://doi.org/10.1371/journal.pone.0199965>
- 517 45. Smith MA, Eveleigh ES, McCann KS, et al (2011) Barcoding a quantified food web:  
518 crypsis, concepts, ecology and hypotheses. *PloS One* 6:e14424.  
519 <https://doi.org/10.1371/journal.pone.0014424>
- 520 46. Hebert PDN, Ratnasingham S, Zakharov EV, et al (2016) Counting animal species with  
521 DNA barcodes: Canadian insects. *Philos Trans R Soc Lond B Biol Sci* 371:.  
522 <https://doi.org/10.1098/rstb.2015.0333>
- 523 47. Guerrieri E, Giorgini M, Cascone P, et al (2016) Species diversity in the parasitoid genus  
524 *Asobara* (Hymenoptera: Braconidae) from the native area of the fruit fly pest *Drosophila*  
525 *suzukii* (Diptera: Drosophilidae). *PloS One* 11:e0147382.  
526 <https://doi.org/10.1371/journal.pone.0147382>
- 527 48. Vet LEM, Janse CJ (1984) Fitness of two sibling species of *Asobara*  
528 (Braconidae:Alysiniinae), larval parasitoids of *Drosophilidae* in different microhabitats. *Ecol*  
529 *Entomol* 9:345–354. <https://doi.org/10.1111/j.1365-2311.1984.tb00858.x>
- 530 49. Anderl I, Vesala L, Ihalainen TO, et al (2016) Transdifferentiation and proliferation in two  
531 distinct hemocyte lineages in *Drosophila melanogaster* larvae after wasp infection. *PLOS*  
532 *Pathog* 12:e1005746. <https://doi.org/10.1371/journal.ppat.1005746>
- 533 50. Rizki MTM (1957) Alterations in the haemocyte population of *Drosophila melanogaster*. *J*  
534 *Morphol* 100:437–458. <https://doi.org/10.1002/jmor.1051000303>
- 535 51. Tokusumi T, Sorrentino RP, Russell M, et al (2009) Characterization of a lamellocyte  
536 transcriptional enhancer located within the *misshapen* gene of *Drosophila melanogaster*.  
537 *PLOS ONE* 4:e6429. <https://doi.org/10.1371/journal.pone.0006429>

- 538 52. Avet-Rochex A, Boyer K, Polesello C, et al (2010) An *in vivo* RNA interference screen  
539 identifies gene networks controlling *Drosophila melanogaster* blood cell homeostasis. BMC  
540 Dev Biol 10:65. <https://doi.org/10.1186/1471-213X-10-65>
- 541 53. Yang H, Kronhamn J, Ekström J-O, et al (2015) JAK/STAT signaling in *Drosophila* muscles  
542 controls the cellular immune response against parasitoid infection. EMBO Rep 16:1664–  
543 1672. <https://doi.org/10.15252/embr.201540277>
- 544 54. Sorrentino RP, Carton Y, Govind S (2002) Cellular immune response to parasite infection  
545 in the *Drosophila* lymph gland is developmentally regulated. Dev Biol 243:65–80.  
546 <https://doi.org/10.1006/dbio.2001.0542>
- 547 55. Su YC, Treisman JE, Skolnik EY (1998) The *Drosophila* Ste20-related kinase misshapen is  
548 required for embryonic dorsal closure and acts through a JNK MAPK module on an  
549 evolutionarily conserved signaling pathway. Genes Dev 12:2371–2380.  
550 <https://doi.org/10.1101/gad.12.15.2371>
- 551 56. Delaney JR, Stöven S, Uvell H, et al (2006) Cooperative control of *Drosophila* immune  
552 responses by the JNK and NF- $\kappa$ B signaling pathways. EMBO J 25:3068–3077.  
553 <https://doi.org/10.1038/sj.emboj.7601182>
- 554 57. Arthur JSC, Ley SC (2013) Mitogen-activated protein kinases in innate immunity. Nat Rev  
555 Immunol 13:679–692. <https://doi.org/10.1038/nri3495>
- 556 58. Williams MJ, Wiklund M-L, Wikman S, Hultmark D (2006) Rac1 signalling in the *Drosophila*  
557 larval cellular immune response. J Cell Sci 119:2015–2024.  
558 <https://doi.org/10.1242/jcs.02920>
- 559 59. Wertheim B, Kraaijeveld AR, Hopkins MG, et al (2011) Functional genomics of the  
560 evolution of increased resistance to parasitism in *Drosophila*. Mol Ecol 20:932–949.  
561 <https://doi.org/10.1111/j.1365-294X.2010.04911.x>
- 562 60. Jones RM, Wu H, Wentworth C, et al (2008) *Salmonella* AvrA coordinates suppression of  
563 host immune and apoptotic defenses via JNK pathway blockade. Cell Host Microbe 3:233–  
564 244. <https://doi.org/10.1016/j.chom.2008.02.016>
- 565 61. Chen H, Yang D, Han F, et al (2017) The bacterial T6SS effector EvpP prevents NLRP3  
566 inflammasome activation by inhibiting the Ca<sup>2+</sup>-dependent MAPK-Jnk pathway. Cell Host  
567 Microbe 21:47–58. <https://doi.org/10.1016/j.chom.2016.12.004>
- 568 62. Haidar M, Rchiad Z, Ansari HR, et al (2018) miR-126-5p by direct targeting of JNK-  
569 interacting protein-2 (JIP-2) plays a key role in *Theileria*-infected macrophage virulence.  
570 PLoS Pathog 14:e1006942. <https://doi.org/10.1371/journal.ppat.1006942>
- 571 63. Cattenoz PB, Sakr R, Pavlidaki A, et al (2020) Temporal specificity and heterogeneity of  
572 *Drosophila* immune cells. EMBO J 39:e104486. <https://doi.org/10.15252/emboj.2020104486>
- 573 64. Cho B, Yoon S-H, Lee D, et al (2020) Single-cell transcriptome maps of myeloid blood cell  
574 lineages in *Drosophila*. Nat Commun 11:4483. <https://doi.org/10.1038/s41467-020-18135-y>



- 575 65. Fu Y, Huang X, Zhang P, et al (2020) Single-cell RNA sequencing identifies novel cell  
576 types in *Drosophila* blood. J Genet Genomics 47:175–186.  
577 <https://doi.org/10.1016/j.jgg.2020.02.004>
- 578 66. Tattikota SG, Cho B, Liu Y, et al (2020) A single-cell survey of *Drosophila* blood.  
579 eLife 9:e54818. <https://doi.org/10.7554/eLife.54818>
- 580 67. Fisher RC (1961) A study in insect multiparasitism. I. Host selection and oviposition. J Exp  
581 Biol 38:267–275
- 582 68. Salt G (1961) Competition among insect parasitoids. Mechanisms in biological competition.  
583 Symp Soc Exp Biol 15:96–119
- 584 69. Varaldi J, Fouillet P, Ravallec M, et al (2003) Infectious behavior in a parasitoid. Science  
585 302:1930. <https://doi.org/10.1126/science.1088798>
- 586 70. Varaldi J, Boulétreau M, Fleury F (2005) Cost induced by viral particles manipulating  
587 superparasitism behaviour in the parasitoid *Leptopilina boulardi*. Parasitology 131:161–  
588 168. <https://doi.org/10.1017/s0031182005007602>
- 589 71. Varaldi J, Petit S, Boulétreau M, Fleury F (2006) The virus infecting the parasitoid  
590 *Leptopilina boulardi* exerts a specific action on superparasitism behaviour. Parasitology  
591 132:747–756. <https://doi.org/10.1017/S0031182006009930>
- 592 72. Chui H, Sorrentino RP, Govind S (2001) Suppression of the *Drosophila* cellular immune  
593 response by *Ganaspis xanthopoda*. In: Beck G, Sugumaran M, Cooper EL (eds)  
594 Phylogenetic Perspectives on the Vertebrate Immune System. Springer US, pp 161–167
- 595 73. Labrosse C, Stasiak K, Lesobre J, et al (2005) A RhoGAP protein as a main immune  
596 suppressive factor in the *Leptopilina boulardi* (Hymenoptera, Figitidae)–*Drosophila*  
597 *melanogaster* interaction. Insect Biochem Mol Biol 35:93–103.  
598 <https://doi.org/10.1016/j.ibmb.2004.10.004>
- 599 74. Morales J, Chiu H, Oo T, et al (2005) Biogenesis, structure, and immune-suppressive  
600 effects of virus-like particles of a *Drosophila* parasitoid, *Leptopilina victoriae*. J Insect  
601 Physiol 51:181–195. <https://doi.org/10.1016/j.jinsphys.2004.11.002>
- 602 75. Moreau SJM, Asgari S (2015) Venom proteins from parasitoid wasps and their biological  
603 functions. Toxins 7:2385–2412. <https://doi.org/10.3390/toxins7072385>
- 604 76. Coulette Q, Lemauf S, Colinet D, et al (2017) Biochemical characterization and  
605 comparison of aspartylglucosaminidases secreted in venom of the parasitoid wasps  
606 *Asobara tabida* and *Leptopilina heterotoma*. PLOS ONE 12:e0181940.  
607 <https://doi.org/10.1371/journal.pone.0181940>
- 608 77. Moreau SJM, Dingremont A, Doury G, Giordanengo P (2002) Effects of parasitism by  
609 *Asobara tabida* (Hymenoptera: Braconidae) on the development, survival and activity of  
610 *Drosophila melanogaster* larvae. J Insect Physiol 48:337–347.  
611 [https://doi.org/10.1016/S0022-1910\(02\)00051-3](https://doi.org/10.1016/S0022-1910(02)00051-3)

- 612 78. Moreau SJ, Doury G, Giordanengo P (2000) Intraspecific variation in the effects of  
613 parasitism by *Asobara tabida* on phenoloxidase activity of *Drosophila melanogaster* larvae.  
614 J Invertebr Pathol 76:151–153. <https://doi.org/10.1006/jipa.2000.4956>
- 615 79. Moreau SJM, Vinchon S, Cherqui A, Prévost G (2009) Components of *Asobara* venoms  
616 and their effects on hosts. Adv Parasitol 70:217–232. [https://doi.org/10.1016/S0065-](https://doi.org/10.1016/S0065-308X(09)70008-9)  
617 308X(09)70008-9
- 618 80. Goecks J, Mortimer NT, Mobley JA, et al (2013) Integrative approach reveals composition  
619 of endoparasitoid wasp venoms. PLOS One 8:e64125.  
620 <https://doi.org/10.1371/journal.pone.0064125>
- 621 81. Cavigliasso F, Mathé-Hubert H, Kremmer L, et al (2019) Rapid and differential evolution of  
622 the venom composition of a parasitoid wasp depending on the host strain. Toxins 11:.  
623 <https://doi.org/10.3390/toxins11110629>
- 624 82. Dubuffet A, Colinet D, Anselme C, et al (2009) Variation of *Leptopilina boulardi* success in  
625 *Drosophila* hosts: What is inside the black box? In: Parasitology B-A in (ed). Academic  
626 Press, pp 147–188
- 627 83. Mathé-Hubert H, Kremmer L, Colinet D, et al (2019) Variation in the venom of parasitic  
628 wasps, drift, or selection? Insights From a multivariate QST analysis. Front Ecol Evol 7:.  
629 <https://doi.org/10.3389/fevo.2019.00156>
- 630 84. Folmer O, Black M, Hoeh W, et al (1994) DNA primers for amplification of mitochondrial  
631 cytochrome c oxidase subunit I from diverse metazoan invertebrates. Mol Mar Biol  
632 Biotechnol 3:294–299
- 633 85. Altschul SF, Gish W, Miller W, et al (1990) Basic Local Alignment Search Tool. J Mol Biol  
634 215:403–410. [https://doi.org/10.1016/S0022-2836\(05\)80360-2](https://doi.org/10.1016/S0022-2836(05)80360-2)
- 635 86. Camacho C, Coulouris G, Avagyan V, et al (2009) BLAST+: Architecture and applications.  
636 BMC Bioinformatics 10:421. <https://doi.org/10.1186/1471-2105-10-421>
- 637 87. Kumar S, Stecher G, Li M, et al (2018) MEGA X: Molecular evolutionary genetics analysis  
638 across computing platforms. Mol Biol Evol 35:1547–1549.  
639 <https://doi.org/10.1093/molbev/msy096>
- 640 88. Stecher G, Tamura K, Kumar S (2020) Molecular Evolutionary Genetics Analysis (MEGA)  
641 for macOS. Mol Biol Evol. <https://doi.org/10.1093/molbev/msz312>
- 642 89. Nomano FY, Mitsui H, Kimura MT (2015) Capacity of Japanese *Asobara* species  
643 (Hymenoptera; Braconidae) to parasitize a fruit pest *Drosophila suzukii* (Diptera;  
644 Drosophilidae). J Appl Entomol 139:105–113. <https://doi.org/10.1111/jen.12141>
- 645 90. Murata Y, Ideo S, Watada M, et al (2013) Genetic and physiological variation among  
646 sexual and parthenogenetic populations of *Asobara japonica* (Hymenoptera: Braconidae),  
647 a larval parasitoid of drosophilid flies. EJE 106:171–178.  
648 <https://doi.org/10.14411/eje.2009.020>

- 649 91. Kimura M (1980) A simple method for estimating evolutionary rates of base substitutions  
650 through comparative studies of nucleotide sequences. *J Mol Evol* 16:111–120.  
651 <https://doi.org/10.1007/bf01731581>
- 652 92. R Core Team (2020) R: A language and environment for statistical computing
- 653 93. Hothorn T, Bretz F, Westfall P (2008) Simultaneous inference in general parametric  
654 models. *Biom J Biom Z* 50:346–363. <https://doi.org/10.1002/bimj.200810425>
- 655 94. Bates D, Mächler M, Bolker B, Walker S (2015) Fitting linear mixed-effects models using  
656 lme4. *J Stat Softw* 67:1–48. <https://doi.org/10.18637/jss.v067.i01>
- 657 95. Kuznetsova A, Brockhoff PB, Christensen RHB (2017) lmerTest package: Tests in linear  
658 mixed effects models. *J Stat Softw* 82:1–26. <https://doi.org/10.18637/jss.v082.i13>
- 659 96. Wickham H (2011) The split-apply-combine strategy for data analysis. *J Stat Softw* 40:1–  
660 29. <https://doi.org/10.18637/jss.v040.i01>
- 661 97. Lê S, Josse J, Husson F (2008) FactoMineR: An R package for multivariate analysis. *J*  
662 *Stat Softw* 25:1–18. <https://doi.org/10.18637/jss.v025.i01>
- 663 98. Kassambara A, Mundt F (2019) factoextra: Extract and visualize the results of multivariate  
664 data analyses. <https://CRAN.R-project.org/package=factoextra>
- 665 99. Wickham H (2009) ggplot2: Elegant graphics for data analysis. Springer-Verlag, New York  
666

## 1 Figures

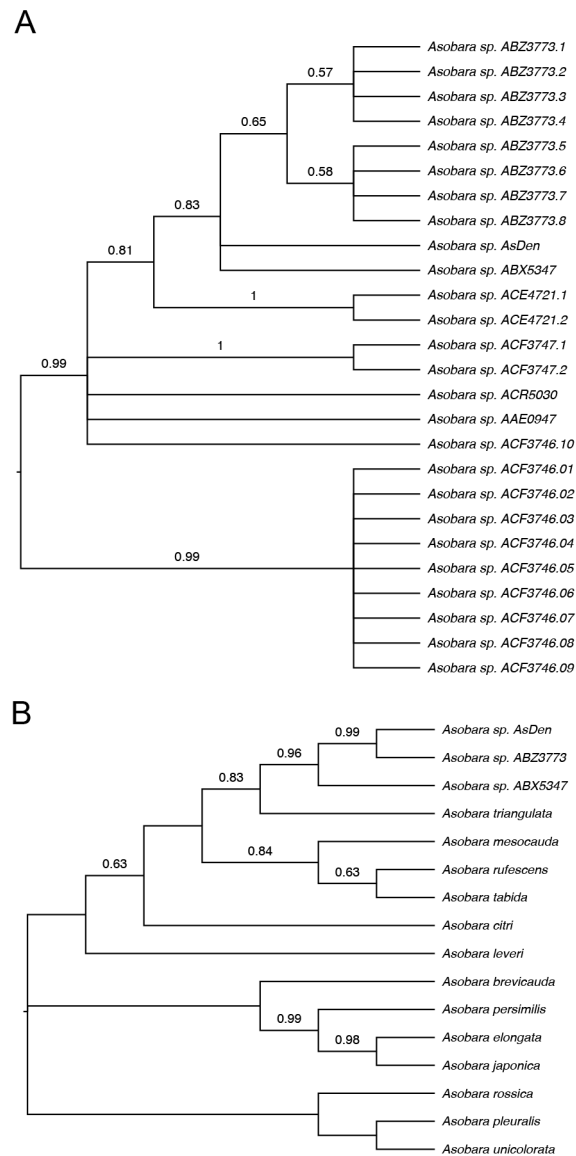

2 **Figure 1.** (A-B) Phylogenetic analysis of the COI gene in *Asobara sp. AsDen* with other  
3 species of the genus *Asobara*. The evolutionary history was inferred by using the  
4 Maximum Likelihood method and the tree with the highest log likelihood is shown. The  
5 proportion of trees from 1000 bootstrap replicates in which the associated taxa  
6 clustered together is displayed, and values below 0.5 are not shown. (A) Phylogeny of  
7 *Asobara sp. AsDen* with sequences from 25 individuals belonging to closely related

- 8 undesci**bed** *Asobara* species (see Supplemental Table 1 for sequence information).
- 9 Strains of the same species have a numerical suffix appended to the species name. (B)
- 10 Phylogeny of *Asobara* sp. *AsDen* with sequences from well-studied species of *Asobara*
- 11 (see Supplemental Table 2 for sequence information).
- 12

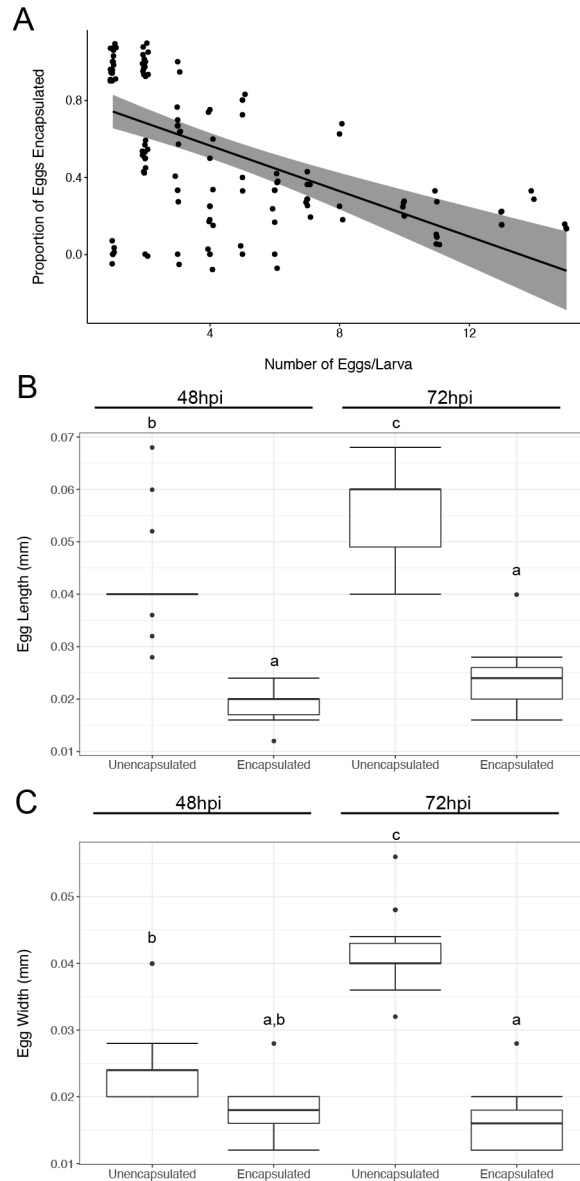

13 **Figure 2.** (A) Scatterplot showing the correlation between the number of infections and  
14 the proportion of *AsDen* eggs encapsulated in  $w^{1118}$  hosts. Individual data points are  
15 shown, and the 95% confidence interval is shaded in grey. The length (B) and width (C)  
16 of both unencapsulated and melanotically encapsulated *AsDen* eggs were determined  
17 at 48- and 72-hours post infection (hpi). Data are displayed as box plots, with calculated  
18 outlier data shown as individual points. Letters (a-c) indicate significance groups within  
19 each experiment as determined by Tukey's HSD.

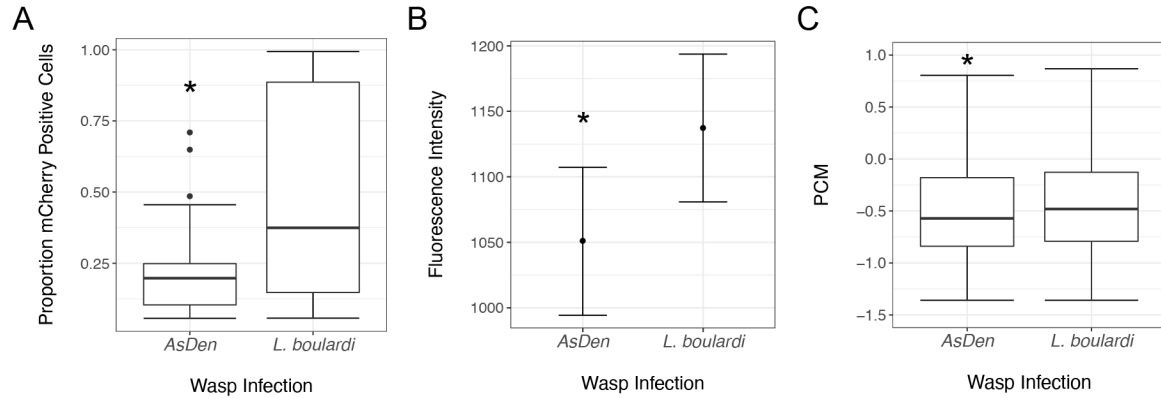

20 **Figure 3.** (A) The proportion of hemocytes positive for *mCherry* isolated from *AsDen*  
21 and *L. boulandi* infected *msn-mCherry* larvae 72 hpi. Data are displayed as box plots,  
22 with calculated outlier data shown as individual points. (B) Calculated fluorescence  
23 intensity of *mCherry* positive hemocytes isolated from *AsDen* and *L. boulandi* infected  
24 larvae 72 hpi. Data are displayed as the mean fit (point) of the effect of parasitoid  
25 species on fluorescence intensity  $\pm$  standard error. (C) PCM values calculated from  
26 hemocytes isolated from *AsDen* and *L. boulandi* infected larvae 72 hpi. Data are  
27 displayed as box plots. \* indicates  $p < 0.05$  compared to *L. boulandi* infected larvae.

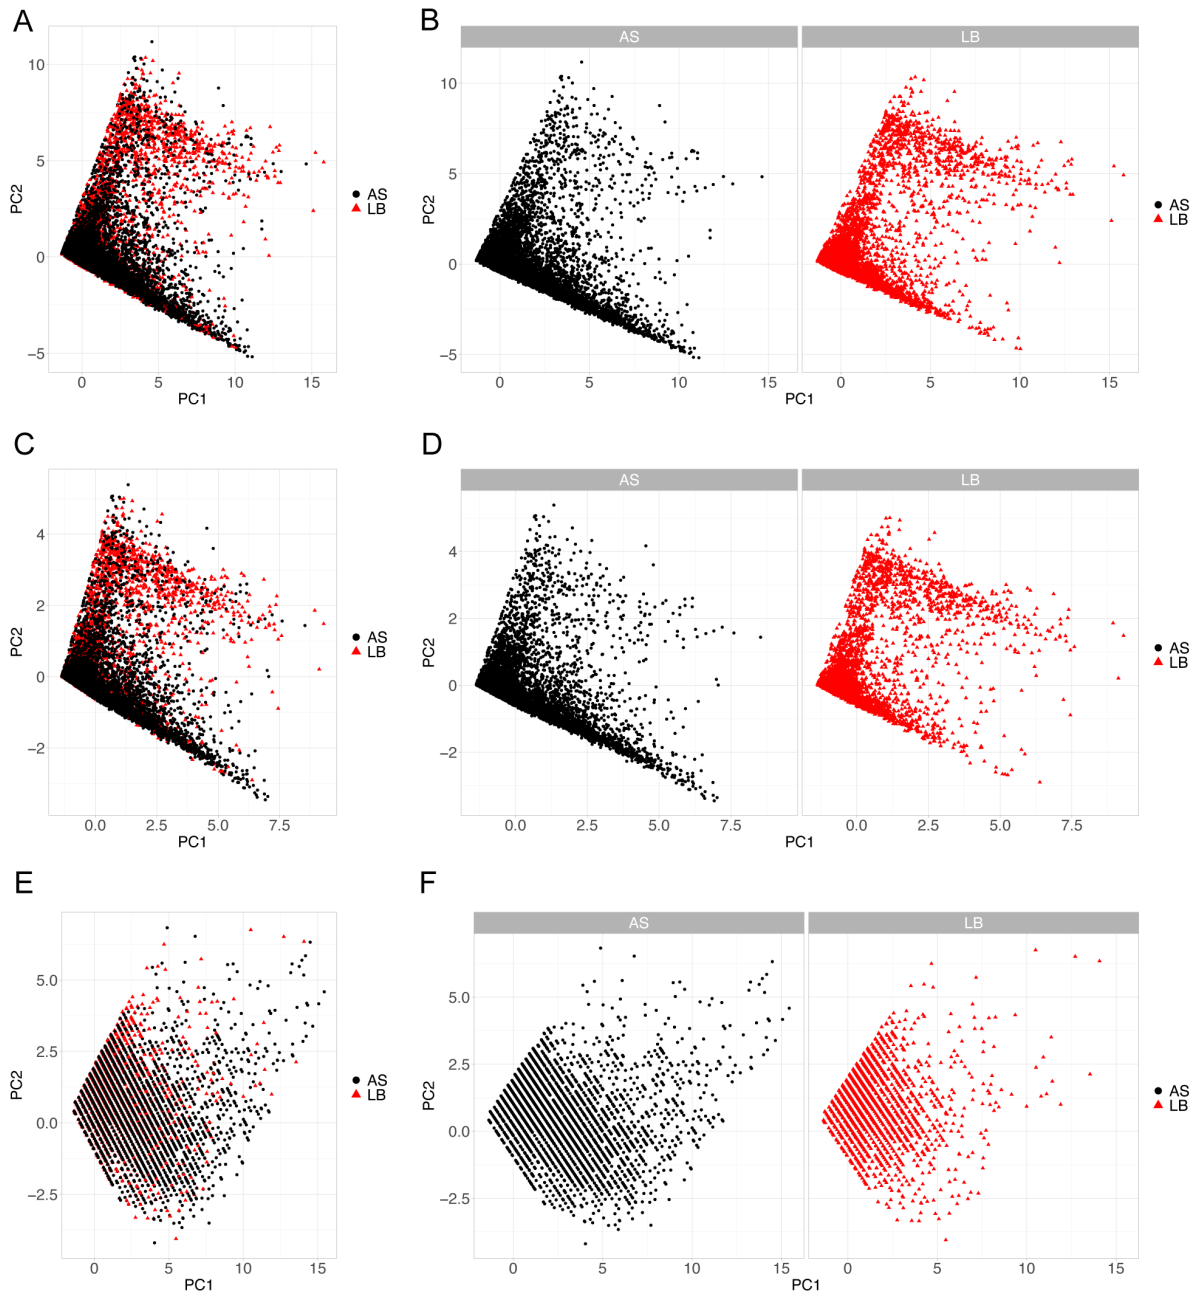

29 **Figure 4.** Plots of the first two principal components from a PCA of cell morphology and  
30 fluorescence intensity performed on (A-B) all hemocytes, (C-D) *msn-mCherry* positive  
31 hemocytes and (E-F) *msn-mCherry* negative hemocytes. Hemocytes were extracted 72hpi from  
32 *msn-mCherry* larvae infected by the indicated parasitoid. Hemocytes from *AsDen* infected  
33 larvae are shown as black circles and as the left panel of faceted images (B,D,F) and



34 hemocytes from *L. boulardi* infected larvae are shown as red triangles and as the right panel of  
35 faceted images.

36

37 **Tables**

38 **Table 1.** BLAST results comparing the *AsDen* COI DNA sequence against a custom  
39 database of 353 *Asobara* COI sequences. The species name, sequence accession  
40 number, score (bits) and identity (%) for the top scoring hits by species are displayed.

| Species Designation        | Accession # | Score (Bits) | Identity (%) |
|----------------------------|-------------|--------------|--------------|
| <i>Asobara sp. ABZ3773</i> | KR886087.1  | 974          | 94           |
| <i>Asobara sp. ABX5347</i> | JN293161.1  | 924          | 93           |
| <i>Asobara sp. ACF3746</i> | HQ929638.1  | 913          | 92           |
| <i>Asobara sp. ACE4721</i> | JN293665.1  | 907          | 92           |
| <i>Asobara sp. ACR5030</i> | MF936732.1  | 902          | 92           |
| <i>Asobara sp. ACF3747</i> | HQ930298.1  | 896          | 92           |
| <i>Asobara sp. AAE0947</i> | HQ106668.1  | 891          | 92           |

41

42 **Table 2.** Eigenvalues and factor loading for the first two dimensions (PC1 and PC2)  
43 from PCA of cell morphology and fluorescence intensity of all hemocytes extracted from  
44 *L. bouhardi* and *AsDen* infected *msn-mCherry* larvae, as shown in Figure 4A-B.

| Variable               | PC1   | PC2    |
|------------------------|-------|--------|
| Eigenvalue             | 1.624 | 0.867  |
| Variance (%)           | 54.13 | 28.90  |
| <i>Factor Loading</i>  |       |        |
| Cell Size              | 0.647 | -0.262 |
| Cell Circularity       | 0.636 | -0.332 |
| Fluorescence intensity | 0.420 | 0.906  |

45

46 **Table S1.** Species names, accession numbers and collection location are given for  
47 samples used to build the phylogeny shown in Figure 1A. Multiple individuals of a  
48 species are listed as independent samples with accession numbers and a numerical

49 suffix appended to the species name. Abbreviations: NP (National Park), SP (State  
50 Park).

| Sample Name                   | Accession # | Collection Location          |
|-------------------------------|-------------|------------------------------|
| <i>Asobara sp. ABZ3773.1</i>  | KR896844.1  | Prince Albert NP, SK, CAN    |
| <i>Asobara sp. ABZ3773.2</i>  | KR898757.1  | Elk Island NP, AB, CAN       |
| <i>Asobara sp. ABZ3773.3</i>  | KR886087.1  | Elk Island NP, AB, CAN       |
| <i>Asobara sp. ABZ3773.4</i>  | KR875914.1  | Prince Albert NP, SK, CAN    |
| <i>Asobara sp. ABZ3773.5</i>  | KR884238.1  | Wellington County, ON, CAN   |
| <i>Asobara sp. ABZ3773.6</i>  | KR888074.1  | Elk Island NP, AB, CAN       |
| <i>Asobara sp. ABZ3773.7</i>  | KR879657.1  | Wellington County, ON, CAN   |
| <i>Asobara sp. ABZ3773.8</i>  | KR784633.1  | Leeds and Grenville, ON, CAN |
| <i>Asobara sp. ABX5347</i>    | JN293161.1  | Yoho NP, BC, CAN             |
| <i>Asobara sp. ACE4721.1</i>  | JN293665.1  | Glacier NP, BC, CAN          |
| <i>Asobara sp. ACE4721.2</i>  | JN292450.1  | Glacier NP, BC, CAN          |
| <i>Asobara sp. ACR5030</i>    | MF936732.1  | Gulf Islands NP, BC, CAN     |
| <i>Asobara sp. AAE0947</i>    | HQ106668.1  | Restigouche, NB, CAN         |
| <i>Asobara sp. ACF3747.1</i>  | HQ930298.1  | Bigelow, AR, USA             |
| <i>Asobara sp. ACF3747.2</i>  | KR896531.1  | Wellington County, ON, CAN   |
| <i>Asobara sp. ACF3746.01</i> | HQ929638.1  | Deadhorse Ranch SP, AZ, USA  |
| <i>Asobara sp. ACF3746.02</i> | KY843128.1  | Islamabad, Pakistan          |
| <i>Asobara sp. ACF3746.03</i> | KY845150.1  | Islamabad, Pakistan          |
| <i>Asobara sp. ACF3746.04</i> | KY838943.1  | Islamabad, Pakistan          |
| <i>Asobara sp. ACF3746.05</i> | KY830675.1  | Islamabad, Pakistan          |
| <i>Asobara sp. ACF3746.06</i> | KY843285.1  | Islamabad, Pakistan          |
| <i>Asobara sp. ACF3746.07</i> | KY832326.1  | Islamabad, Pakistan          |
| <i>Asobara sp. ACF3746.08</i> | KY842379.1  | Islamabad, Pakistan          |
| <i>Asobara sp. ACF3746.09</i> | KY830249.1  | Islamabad, Pakistan          |
| <i>Asobara sp. ACF3746.10</i> | KY840132.1  | Islamabad, Pakistan          |
| <i>Asobara sp. AsDen</i>      | MT498809.1  | Denver, CO, USA              |

51

52 **Table S2.** Species and strain names, accession numbers and collection location are  
53 given for samples used to build the phylogeny shown in Figure 1B.

| Species Name               | Strain Name    | Accession # | Collection Location    |
|----------------------------|----------------|-------------|------------------------|
| <i>Asobara sp. ABZ3773</i> | <i>ABZ3773</i> | KR886087.1  | Elk Island NP, AB, CAN |
| <i>Asobara sp. ABX5347</i> | <i>ABX5347</i> | JN293161.1  | Yoho NP, BC, CAN       |
| <i>Asobara triangulata</i> | <i>DSZ062</i>  | KT835413.1  | Yunnan, China          |

|                            |                  |            |                      |
|----------------------------|------------------|------------|----------------------|
| <i>Asobara mesocauda</i>   | <i>DSZ061</i>    | KT835414.1 | Yunnan, China        |
| <i>Asobara rufescens</i>   | <i>TK(1)</i>     | AB920758.1 | Tokyo, Japan         |
| <i>Asobara tabida</i>      | <i>AtFr</i>      | JQ808428.1 | Sospel, France       |
| <i>Asobara citri</i>       | <i>AcIC</i>      | JQ808423.1 | Lamto, Cote d'Ivoire |
| <i>Asobara leverii</i>     | <i>DSZ084</i>    | KT835427.1 | South Korea          |
| <i>Asobara brevicauda</i>  | <i>DSZ066</i>    | KT835453.1 | South Korea          |
| <i>Asobara persimilis</i>  | <i>AperAus</i>   | JQ808425.1 | Sydney, Australia    |
| <i>Asobara elongata</i>    | <i>DSZ048</i>    | KT835452.1 | Yunnan, China        |
| <i>Asobara japonica</i>    | <i>AjJap</i>     | JQ808424.1 | Tokyo, Japan         |
| <i>Asobara rossica</i>     | <i>A_rossica</i> | AB456708.1 | Hokkaido, Japan      |
| <i>Asobara pleuralis</i>   | <i>ApIndo</i>    | JQ808427.1 | Manado, Indonesia    |
| <i>Asobara unicolorata</i> | <i>DSZ055</i>    | KT835410.1 | Yunnan, China        |
| <i>Asobara sp. AsDen</i>   | <i>AsDen</i>     | MT498809.1 | Denver, CO, USA      |
